# Supplementary material
Source: publisher figshare collection journal article supplement (https://karger.figshare.com/ndownloader/files/35098318)
Supplement: Supplementary file 1 [file 35098318]

**ONLINE DATA SUPPLEMENT**

List of Supplementary Materials

**e-Figure 1**

**Title:** Example of a complete spirometry test in pdf. format.

**
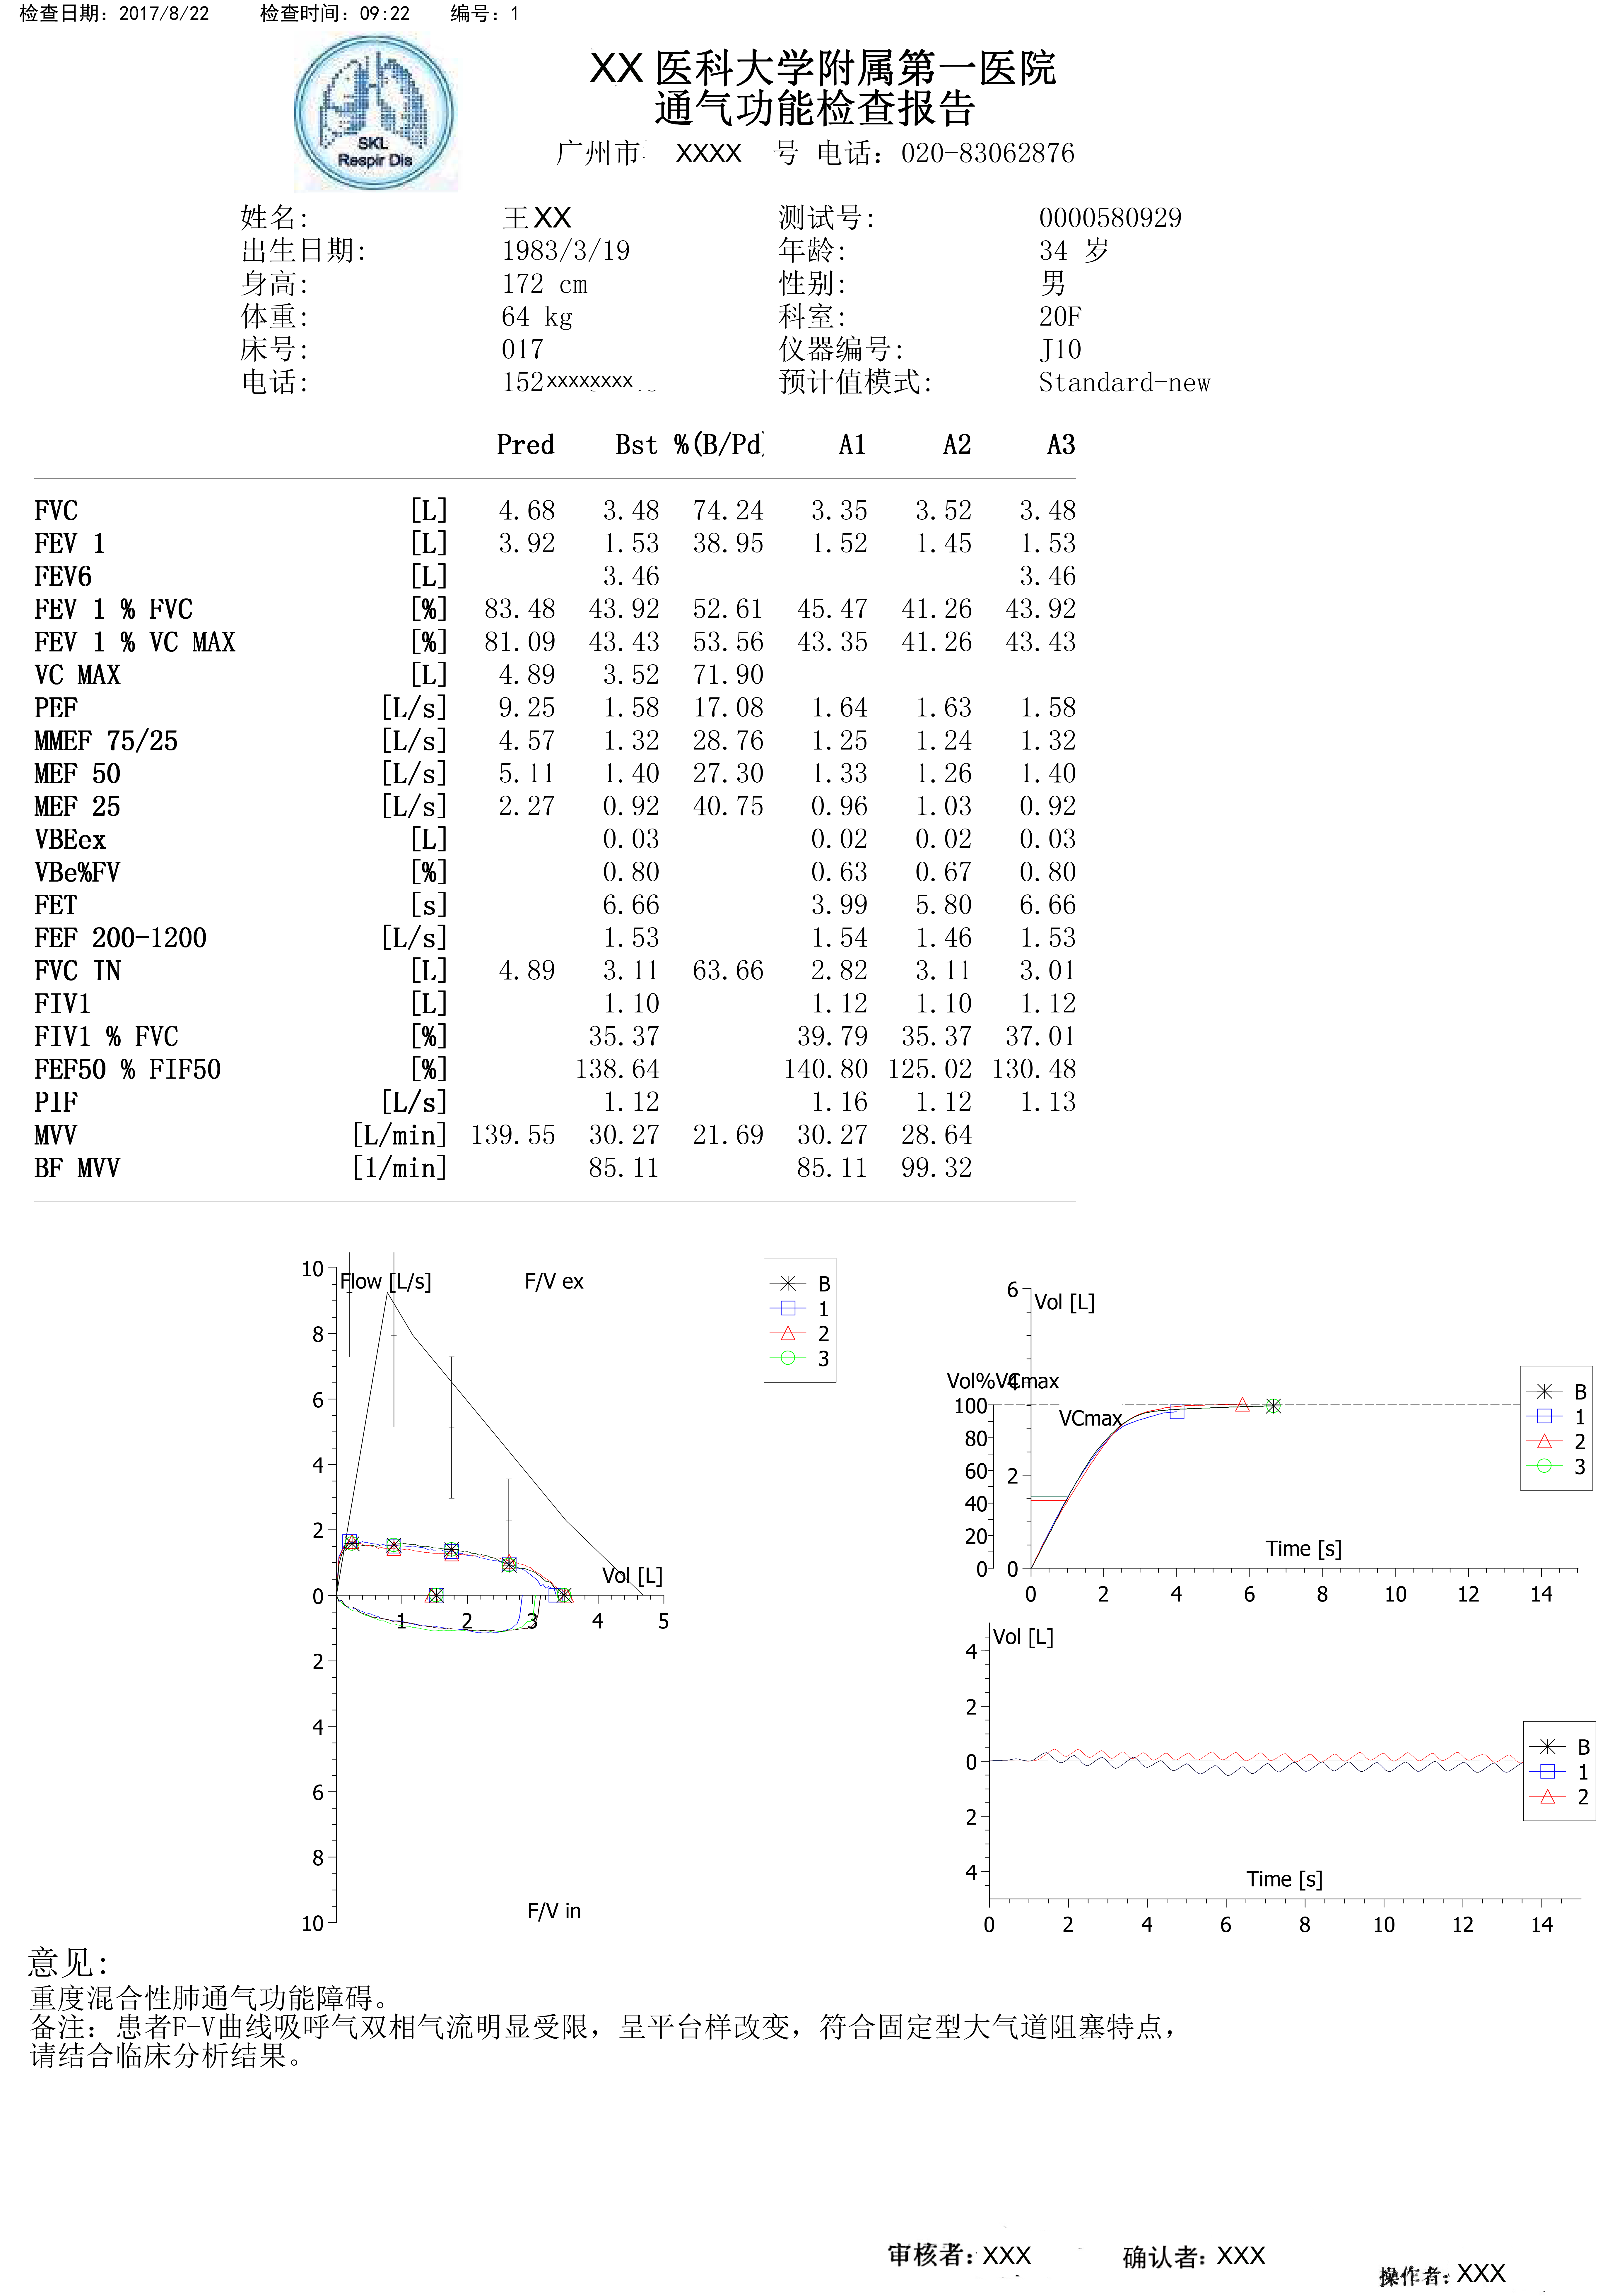
**

**Legend:** The spirometry record includes lung function indices, flow-volume, and volume-time curves with three maneuvers were used in regular clinical practice and as our model inputs. Example in the Chinese language.

**e-Figure 2**

**Title:** Proposed framework for automatic detection of UAO.


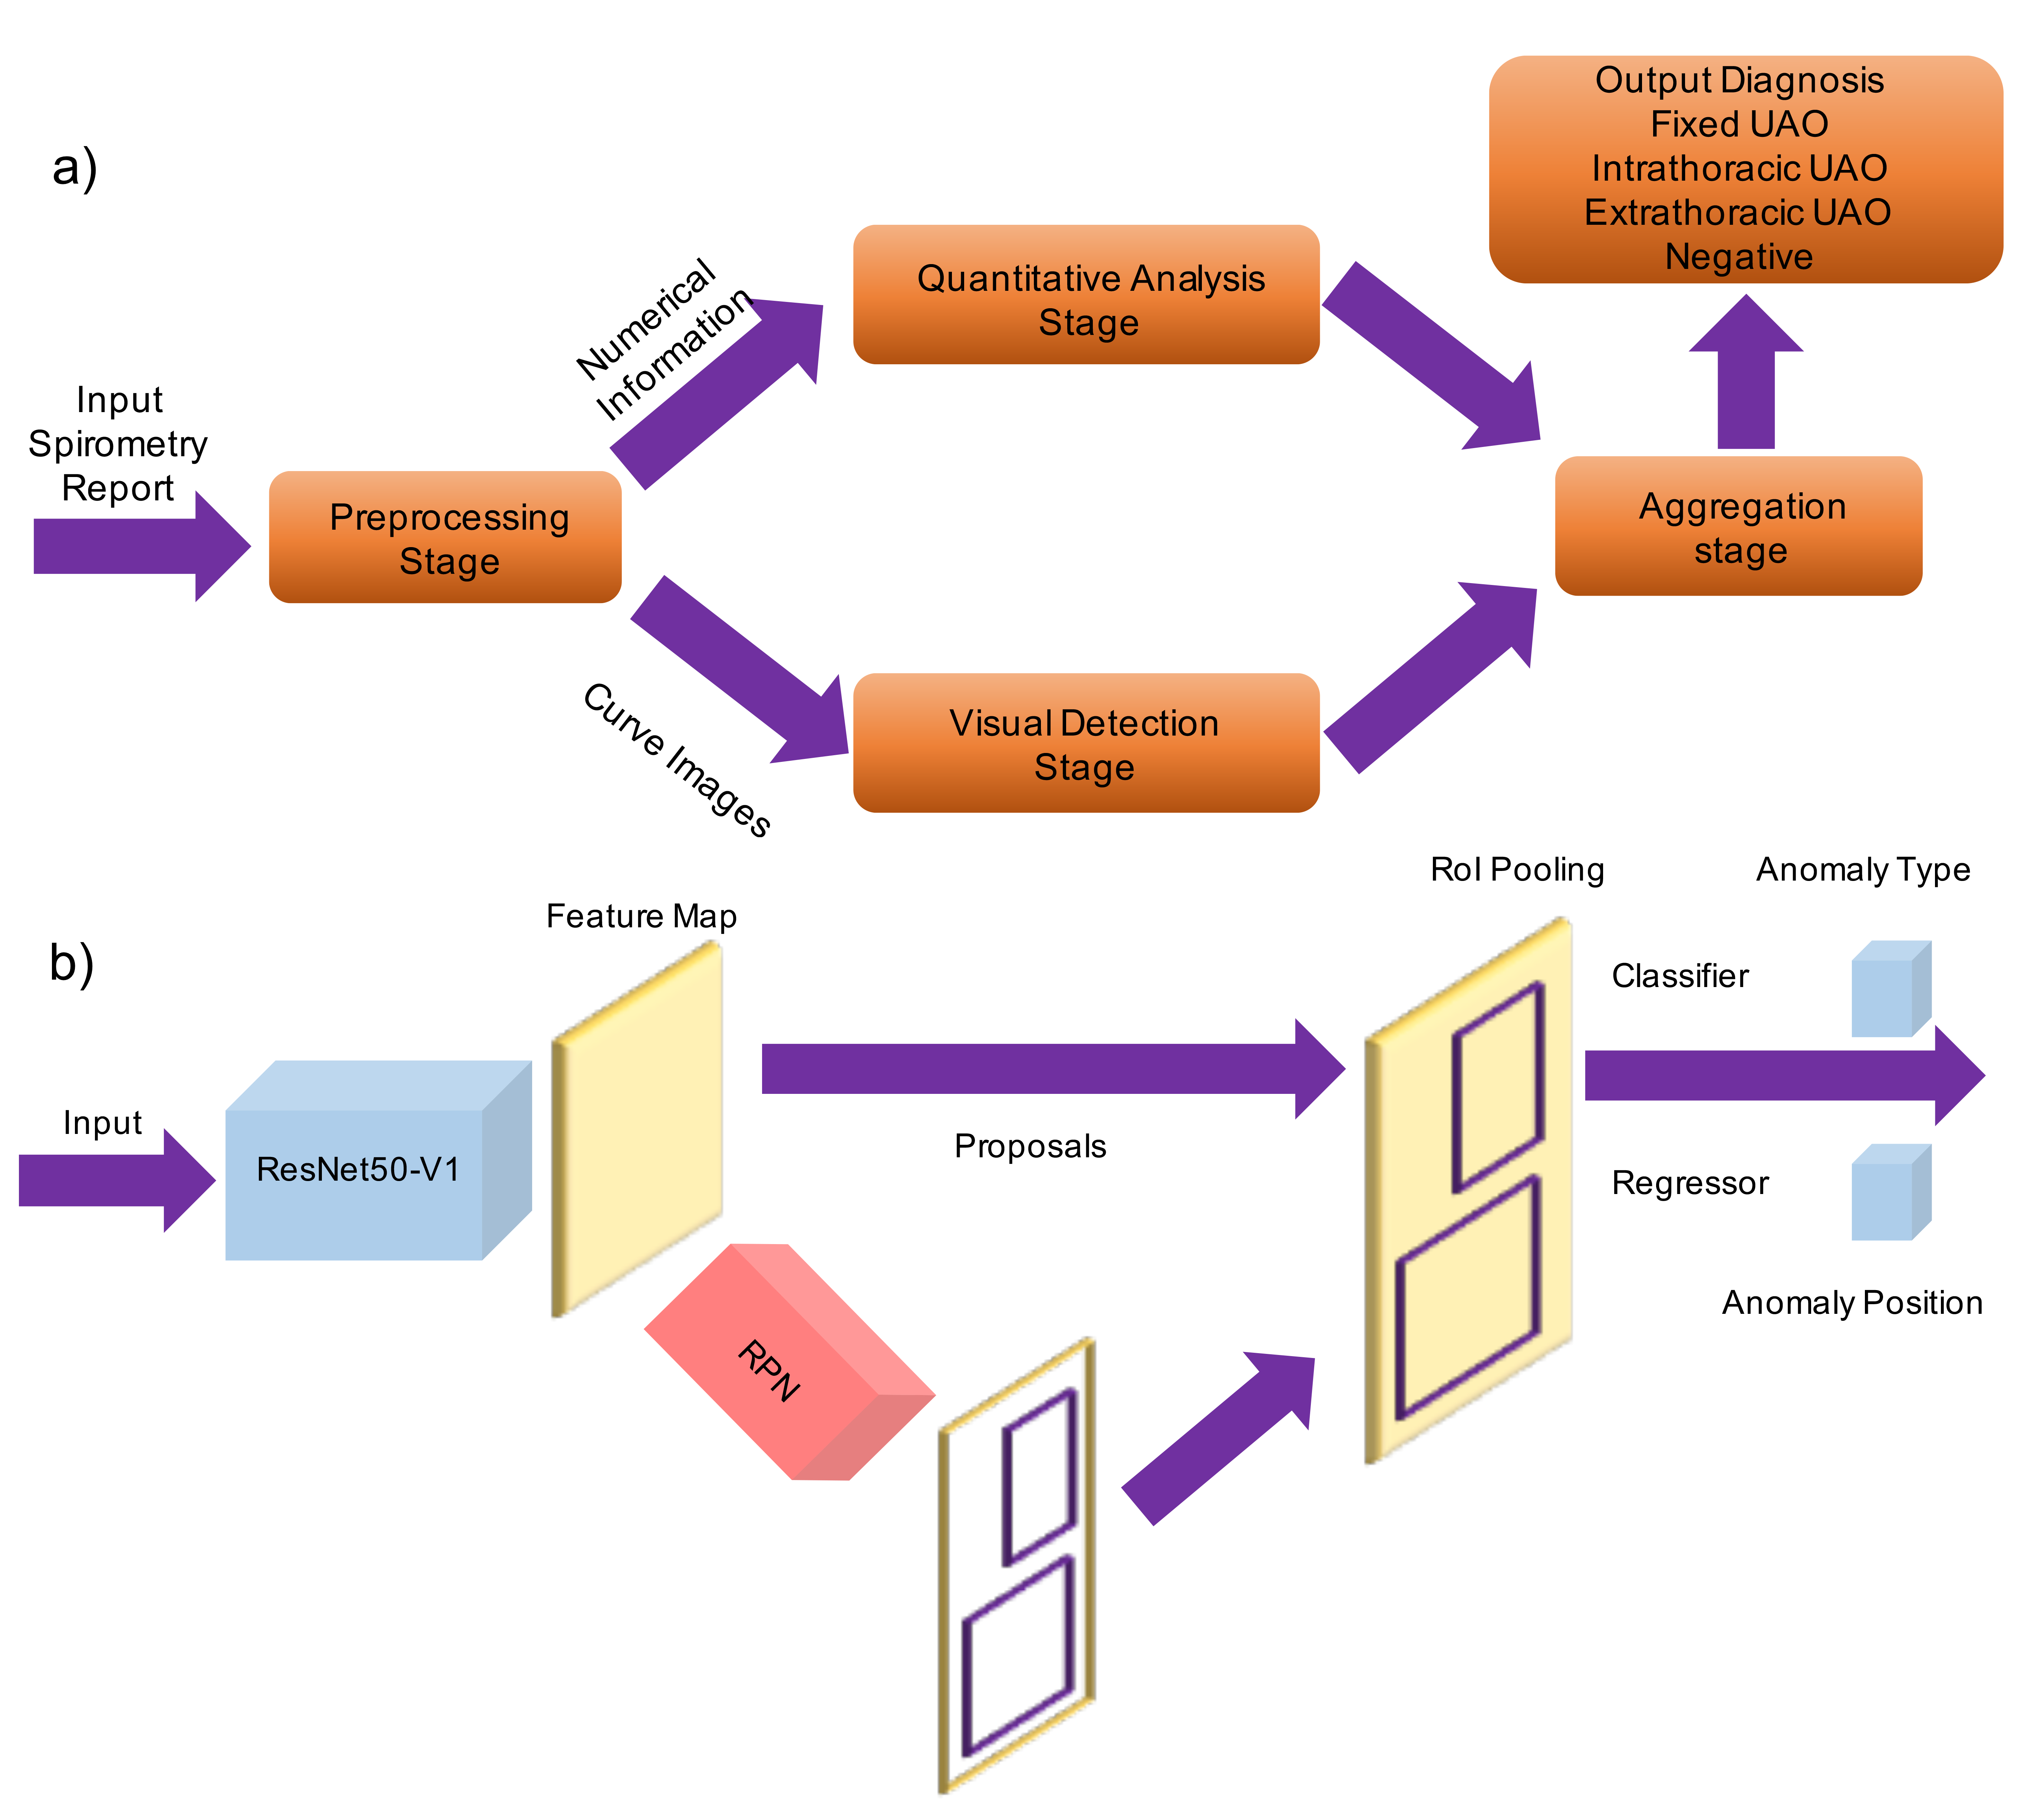


**Legend:** a) The framework has 4 stages. Preprocessing stage will generate both numerical information and curve images from a given spirometry report. During the quantitative stage and visual detection stage, the model will simultaneously do analysis based on the quantitative and visual criterial. After the aggregation stage, the model will give final diagnosis results. b) A deep learning model for anomaly detection. ResNet50-V1 is used for feature extraction. RPN proposes potential positions where an anomaly might appear. RoI pooling extracts feature vectors for final classification and regression. Abbreviations: UAO = upper airway obstruction; RoI = region of interest; RPN = region proposal network.

**e-Figure 3**

**Title:** Output samples from the visual detection stage.


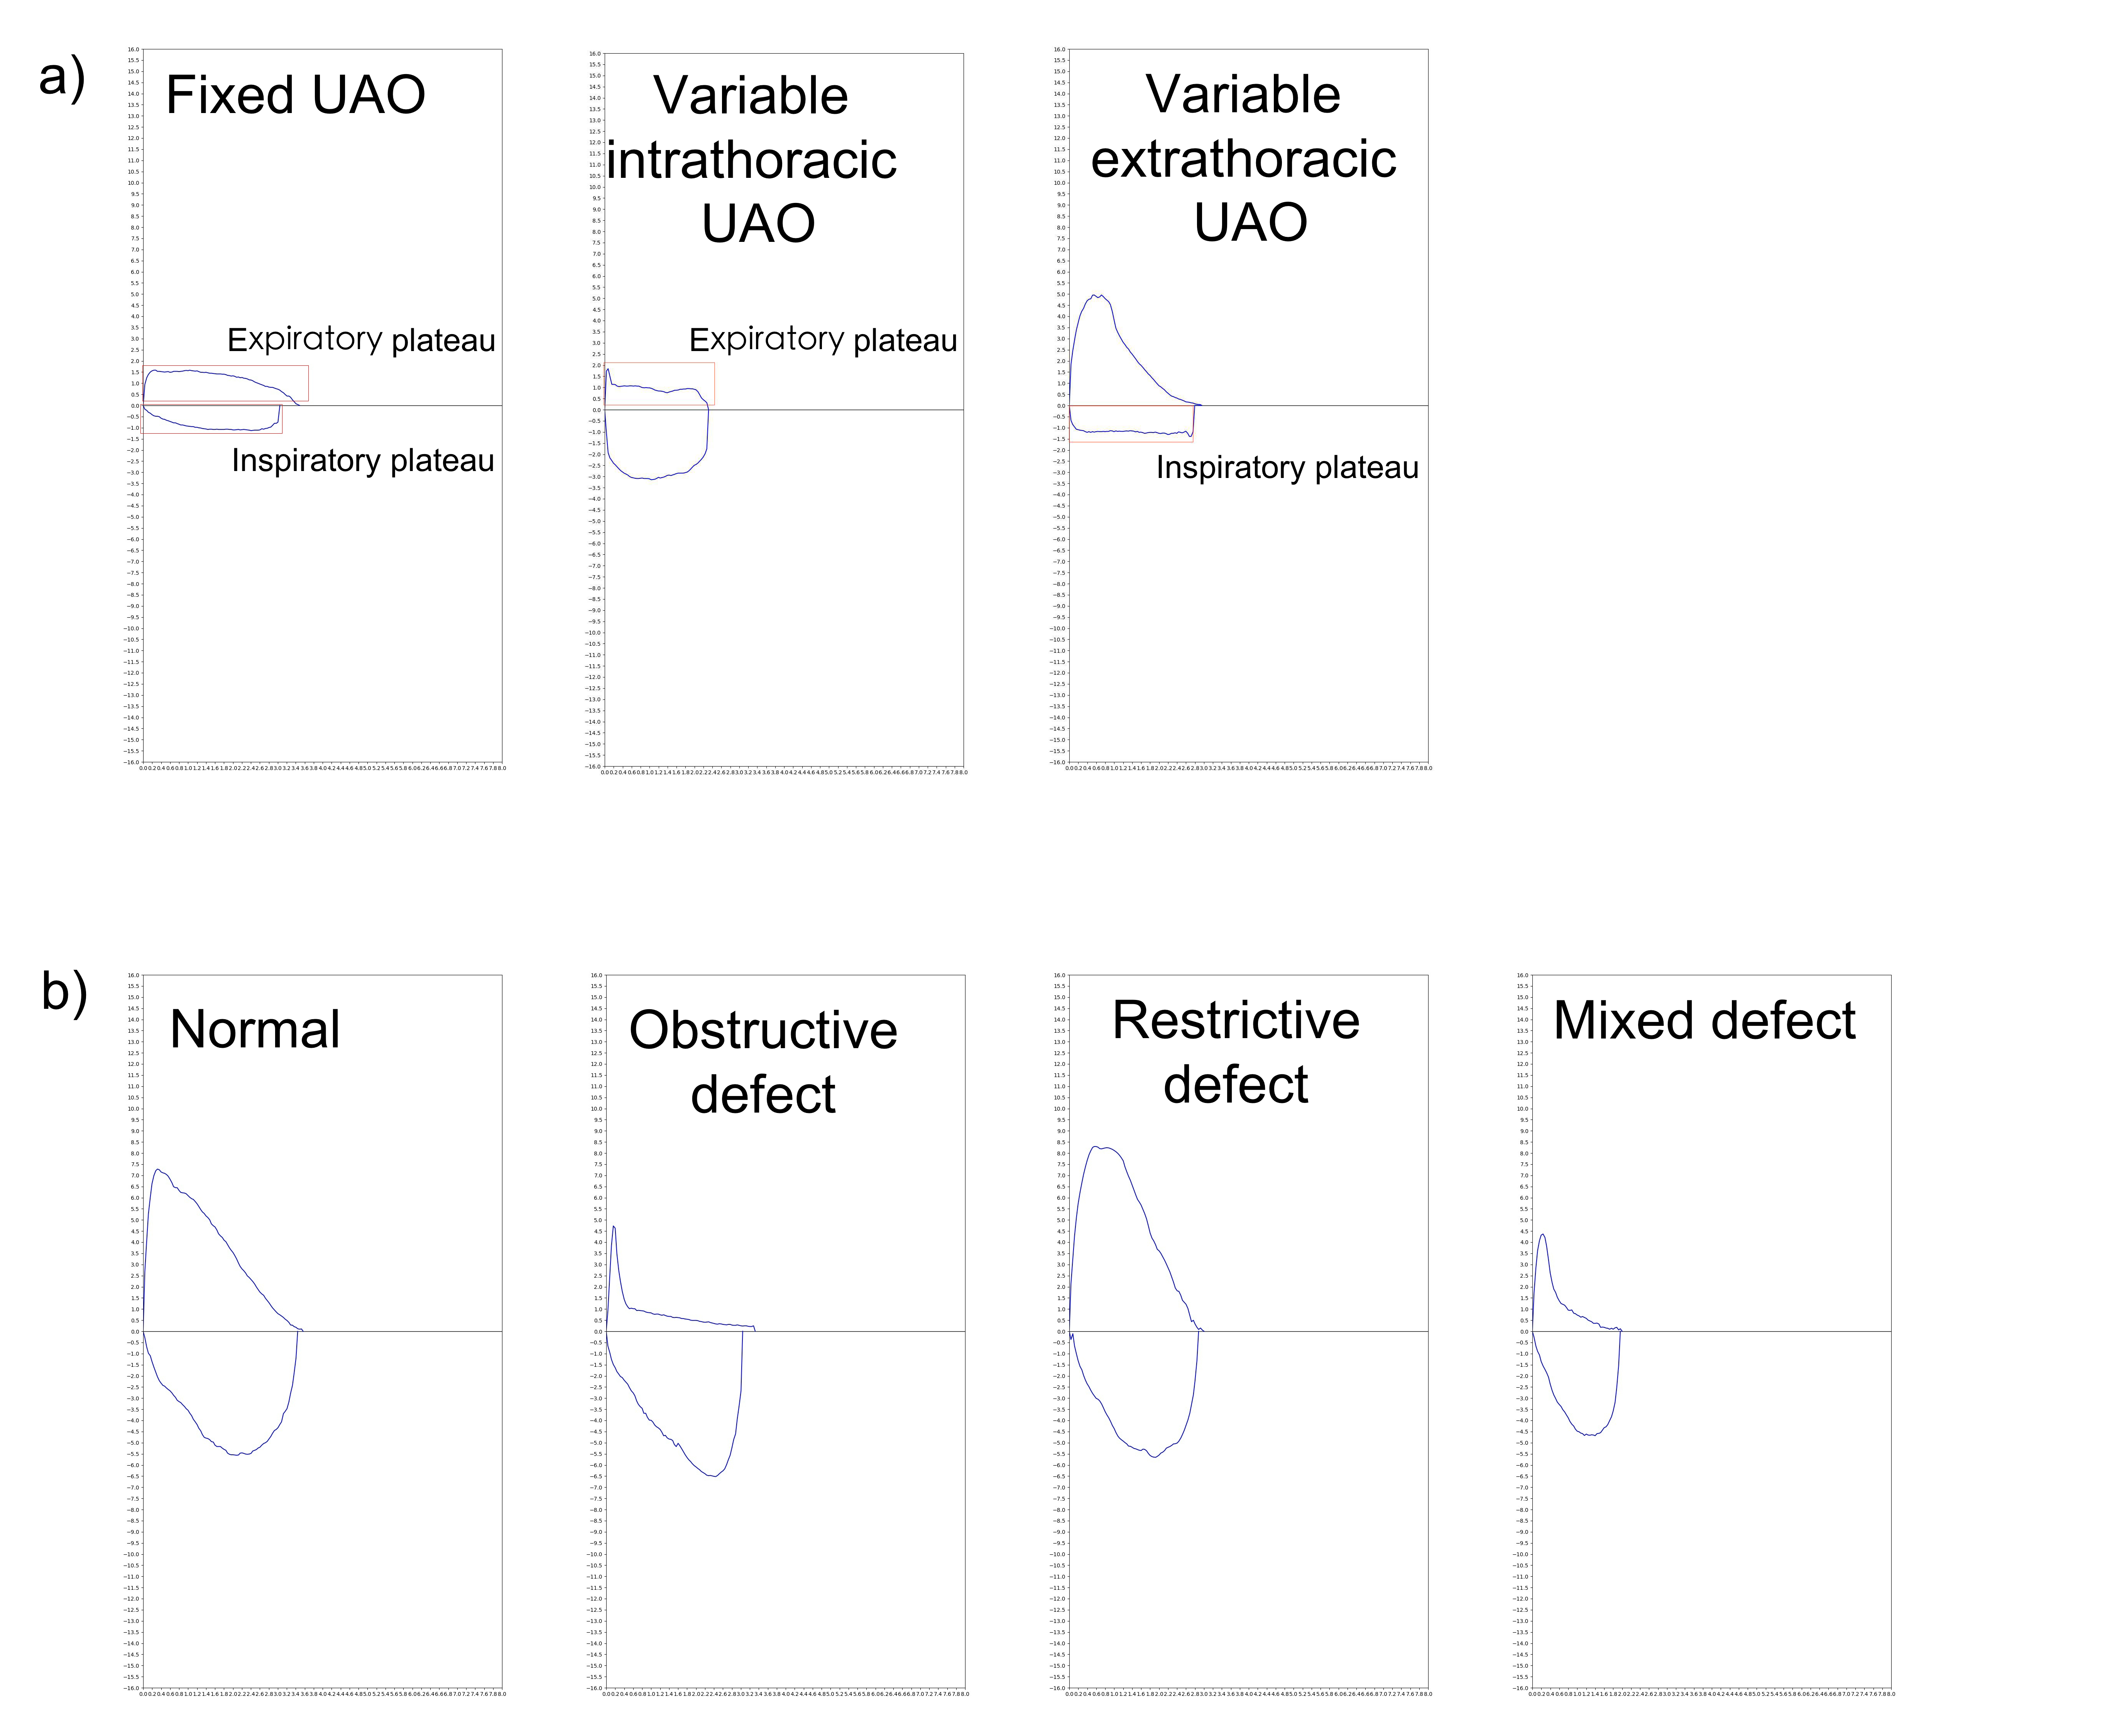


**Legend:** a) UAO samples: a plateau was detected (red frame) in the expiratory and/or inspiratory phases by the model; b) no UAO samples: no anomaly detected. Abbreviations: UAO = upper airway obstruction.

**e-Figure 4**

**Title:** Typical flow-volume curve before and after therapy.


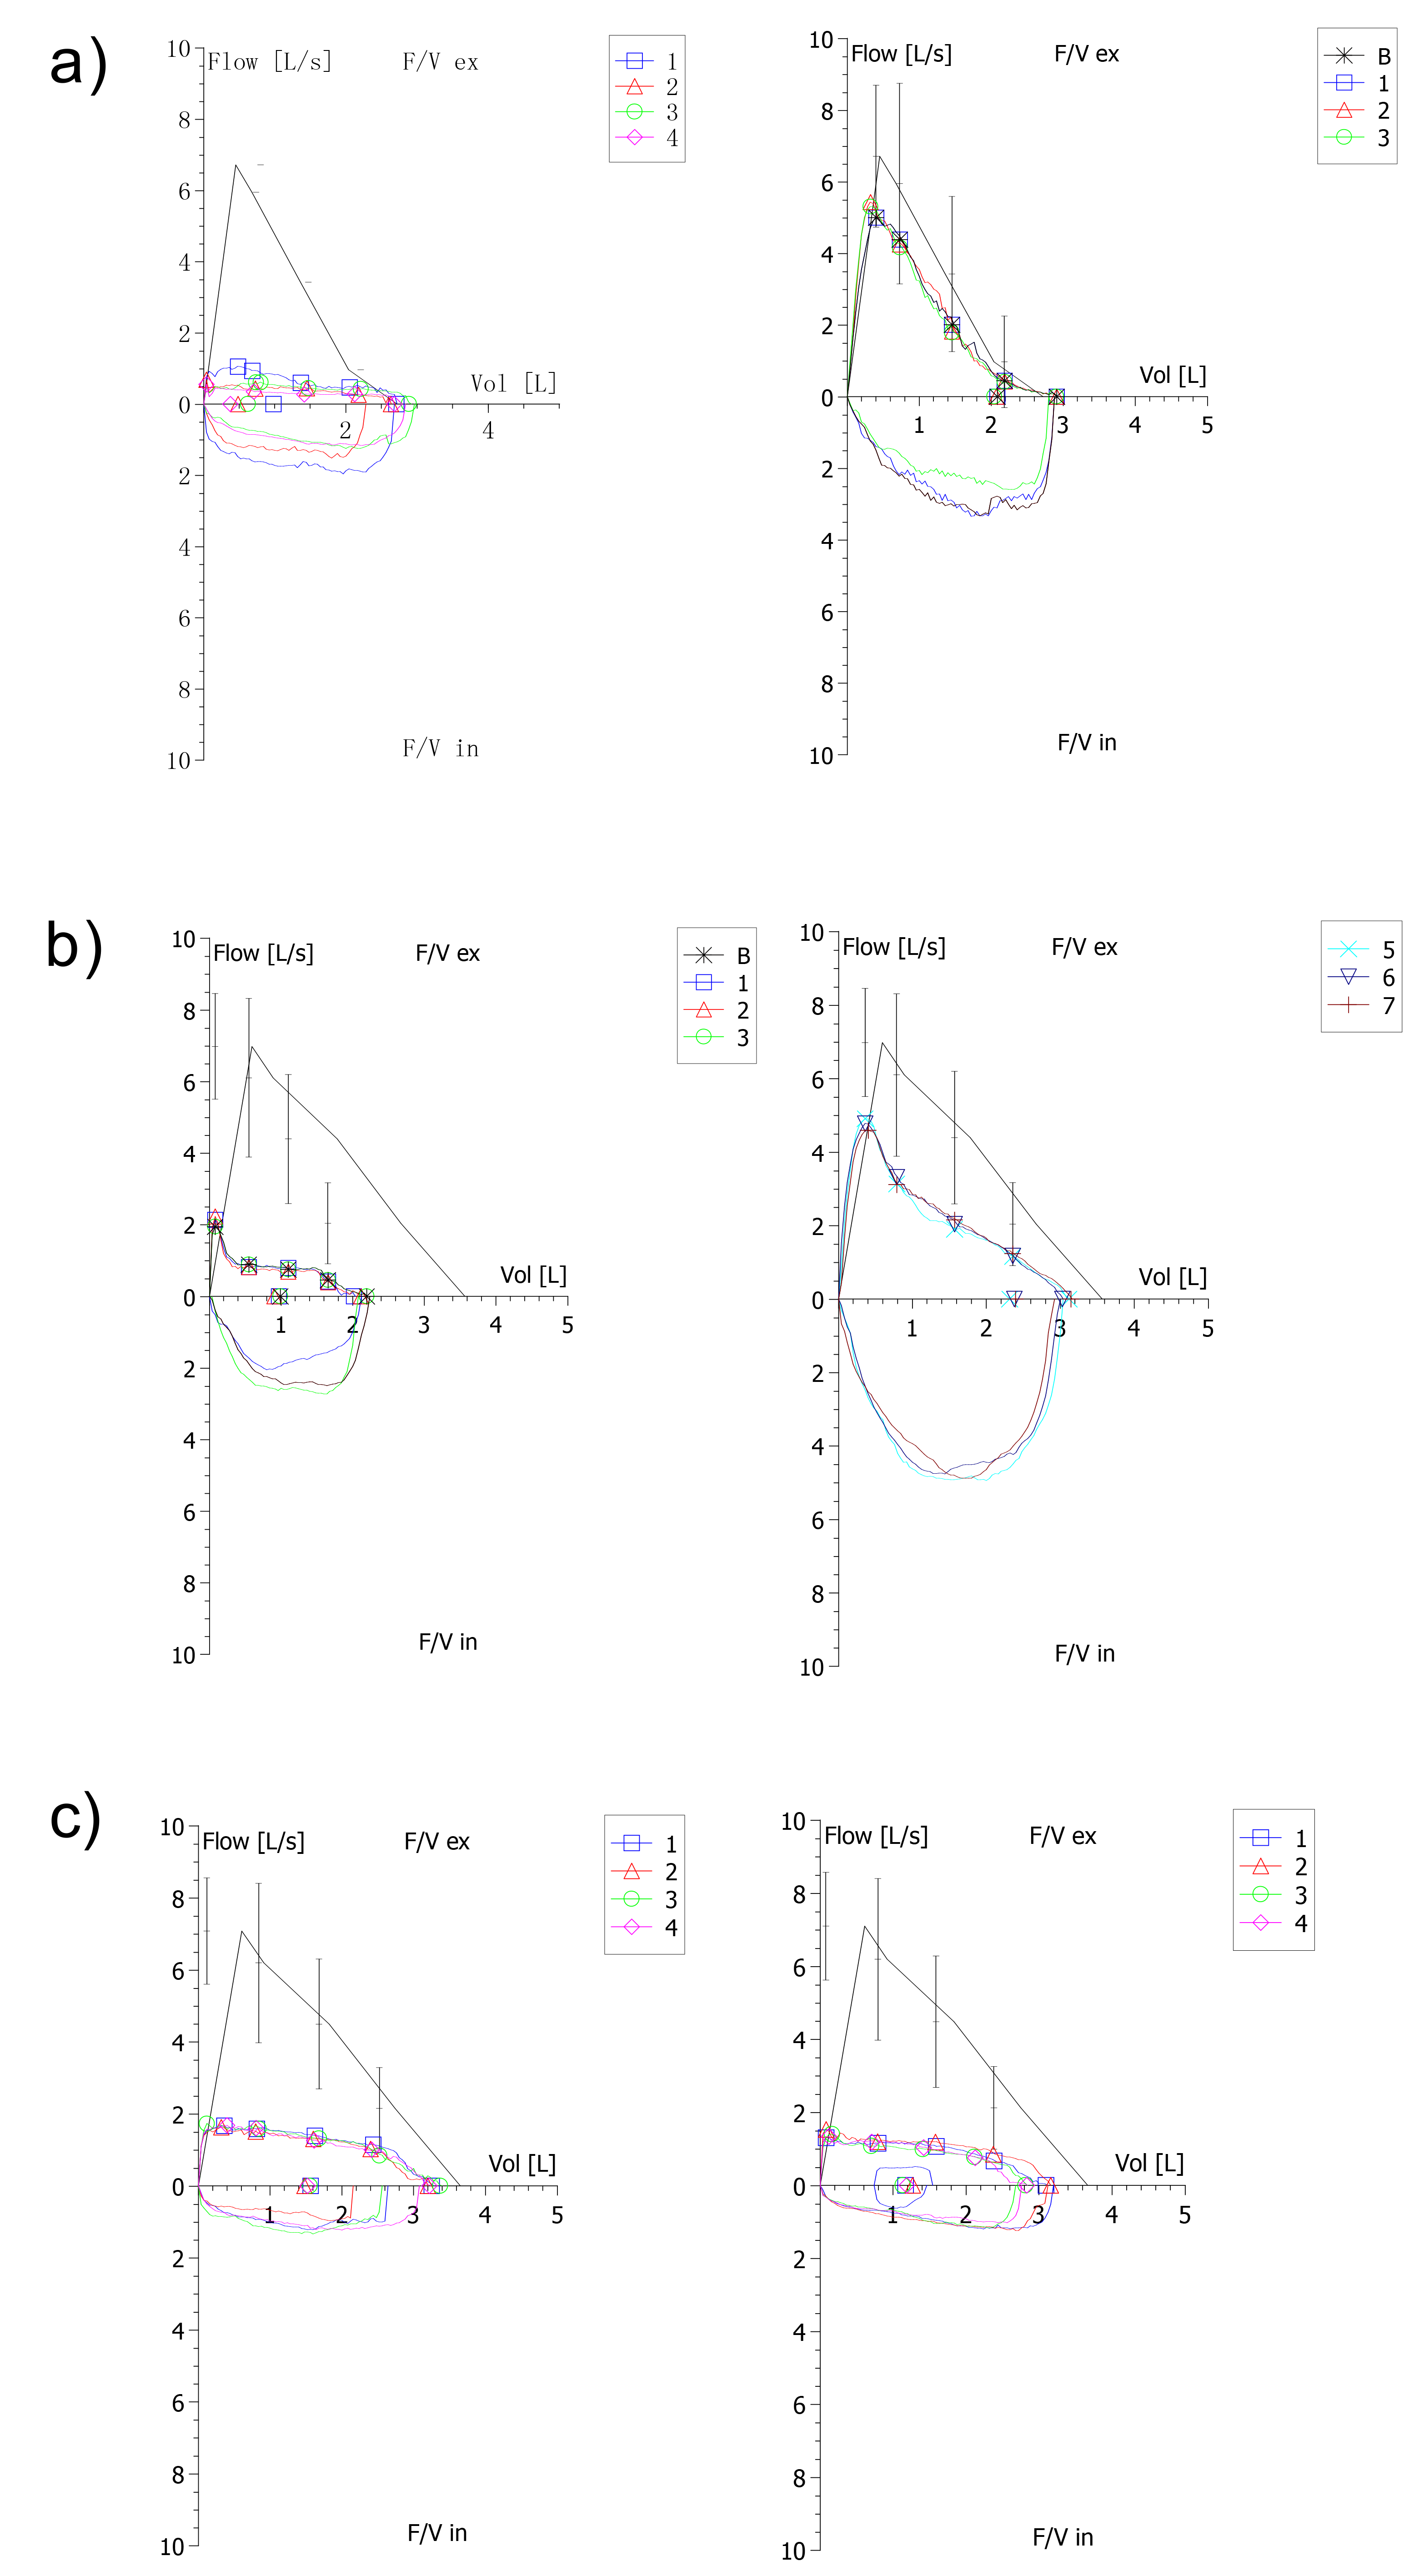


**Legend:** a) Flow curves of a man (aged 63 years, height 151.0 cm) with airway neoplasm before therapy on the left, after therapy on the right; b) Flow curves of a woman (aged 32 years, height 164.5 cm) with carina tumor before therapy on the left, after therapy on the right. c) Flow curves of a woman (aged 29 years, height 165 cm) with tracheal subglottic stenosis due to bonding of vocal cords and trachea before therapy on the left, after therapy on the right.

**e-Figure 5**

**Title:** Representative flow-volume curves, HRCT, and endoscopy of patients with three characteristic patterns of UAO.


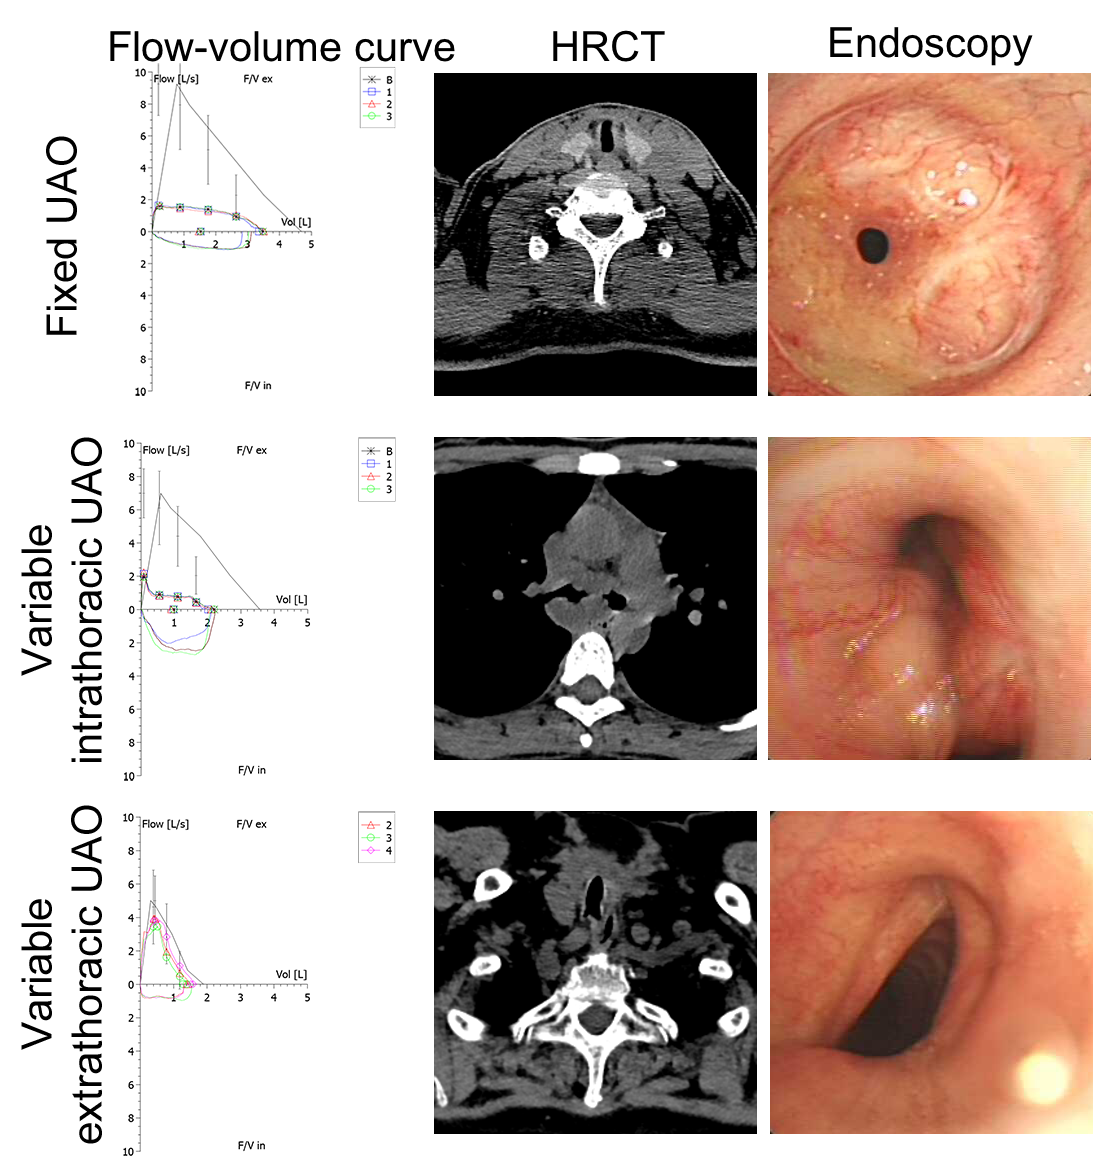


**Legend:** A flattening on the expiratory and (or) inspiratory phase of the curve (fixed, variable intrathoracic or extrathoracic UAO) was well evident, concurrent stenosis seen on HRCT and endoscopy. Abbreviations: UAO = upper airway obstruction; HRCT = high-resolution computed tomography.

**e-Figure 6**

**Title:** Geographic distribution of clinicians.


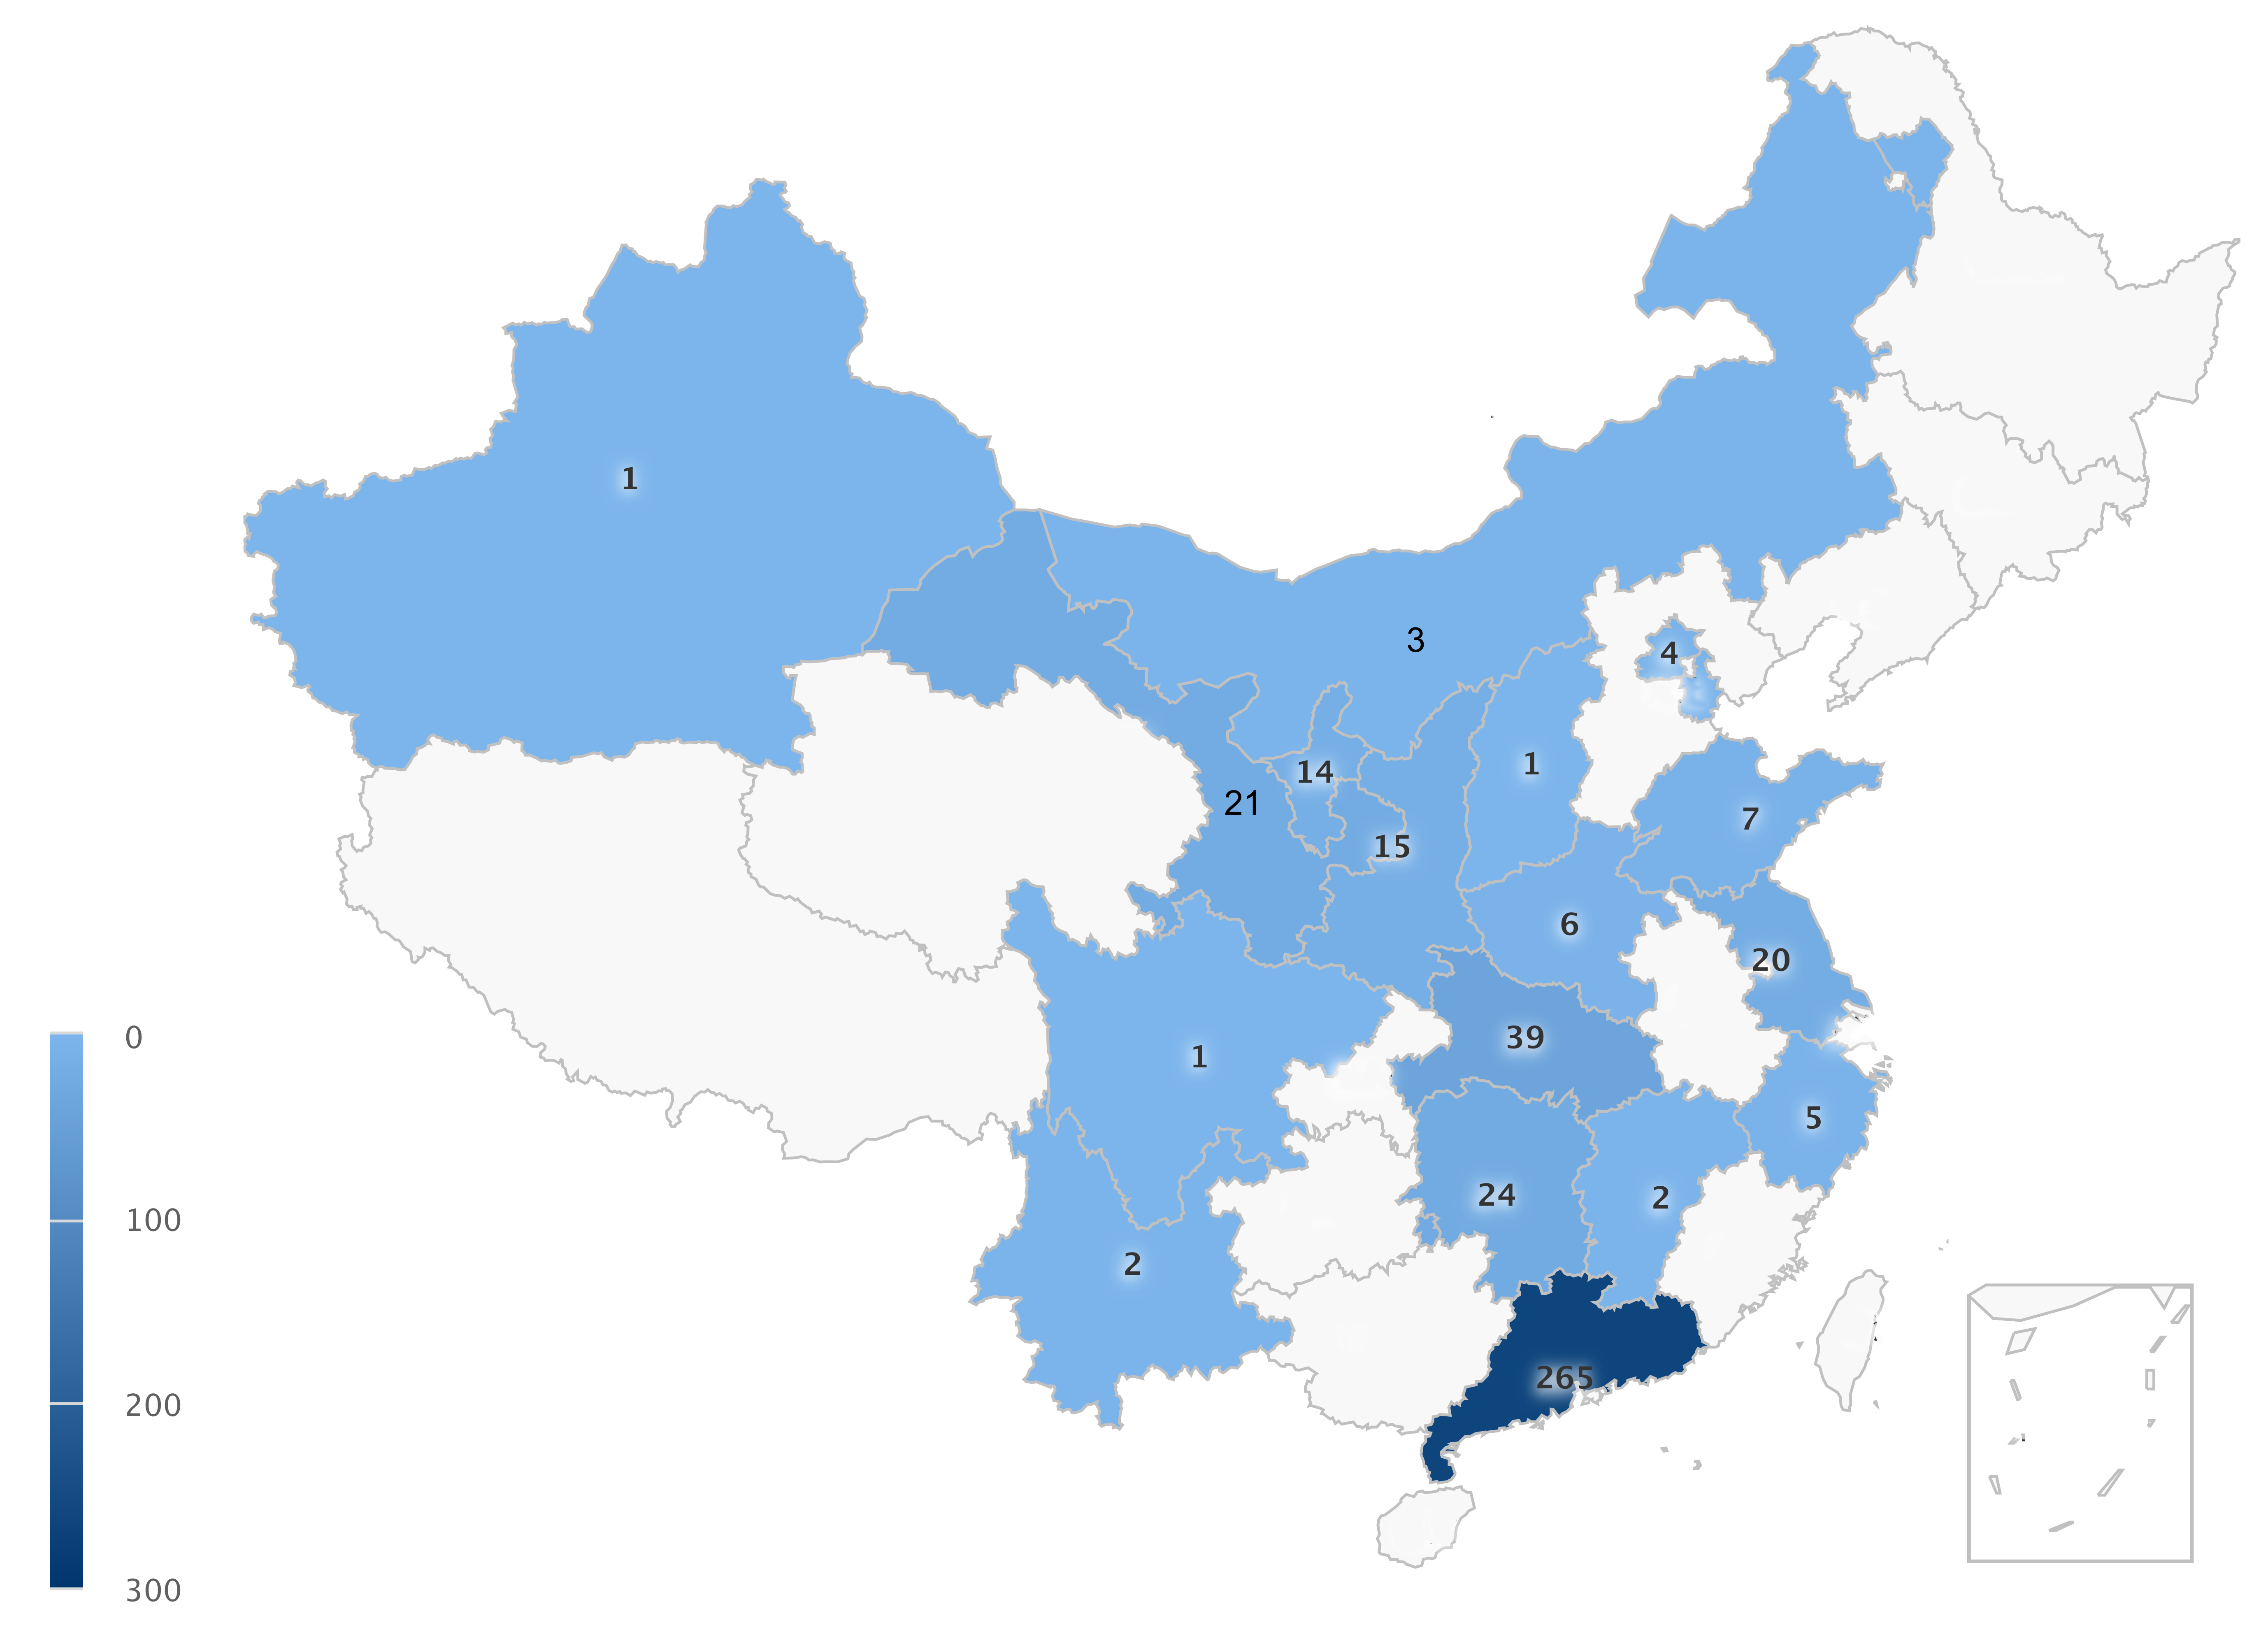


**Legend:** Clinicians in lung function laboratories from different hospitals in 17 provinces in China that participated in detecting UAO using spirometry results and flow-volume curves. Note: The numbers on the map indicate the number of clinicians from each site.

**e-Figure 7**

**Title:** Confusion matrix of the model in the test set.


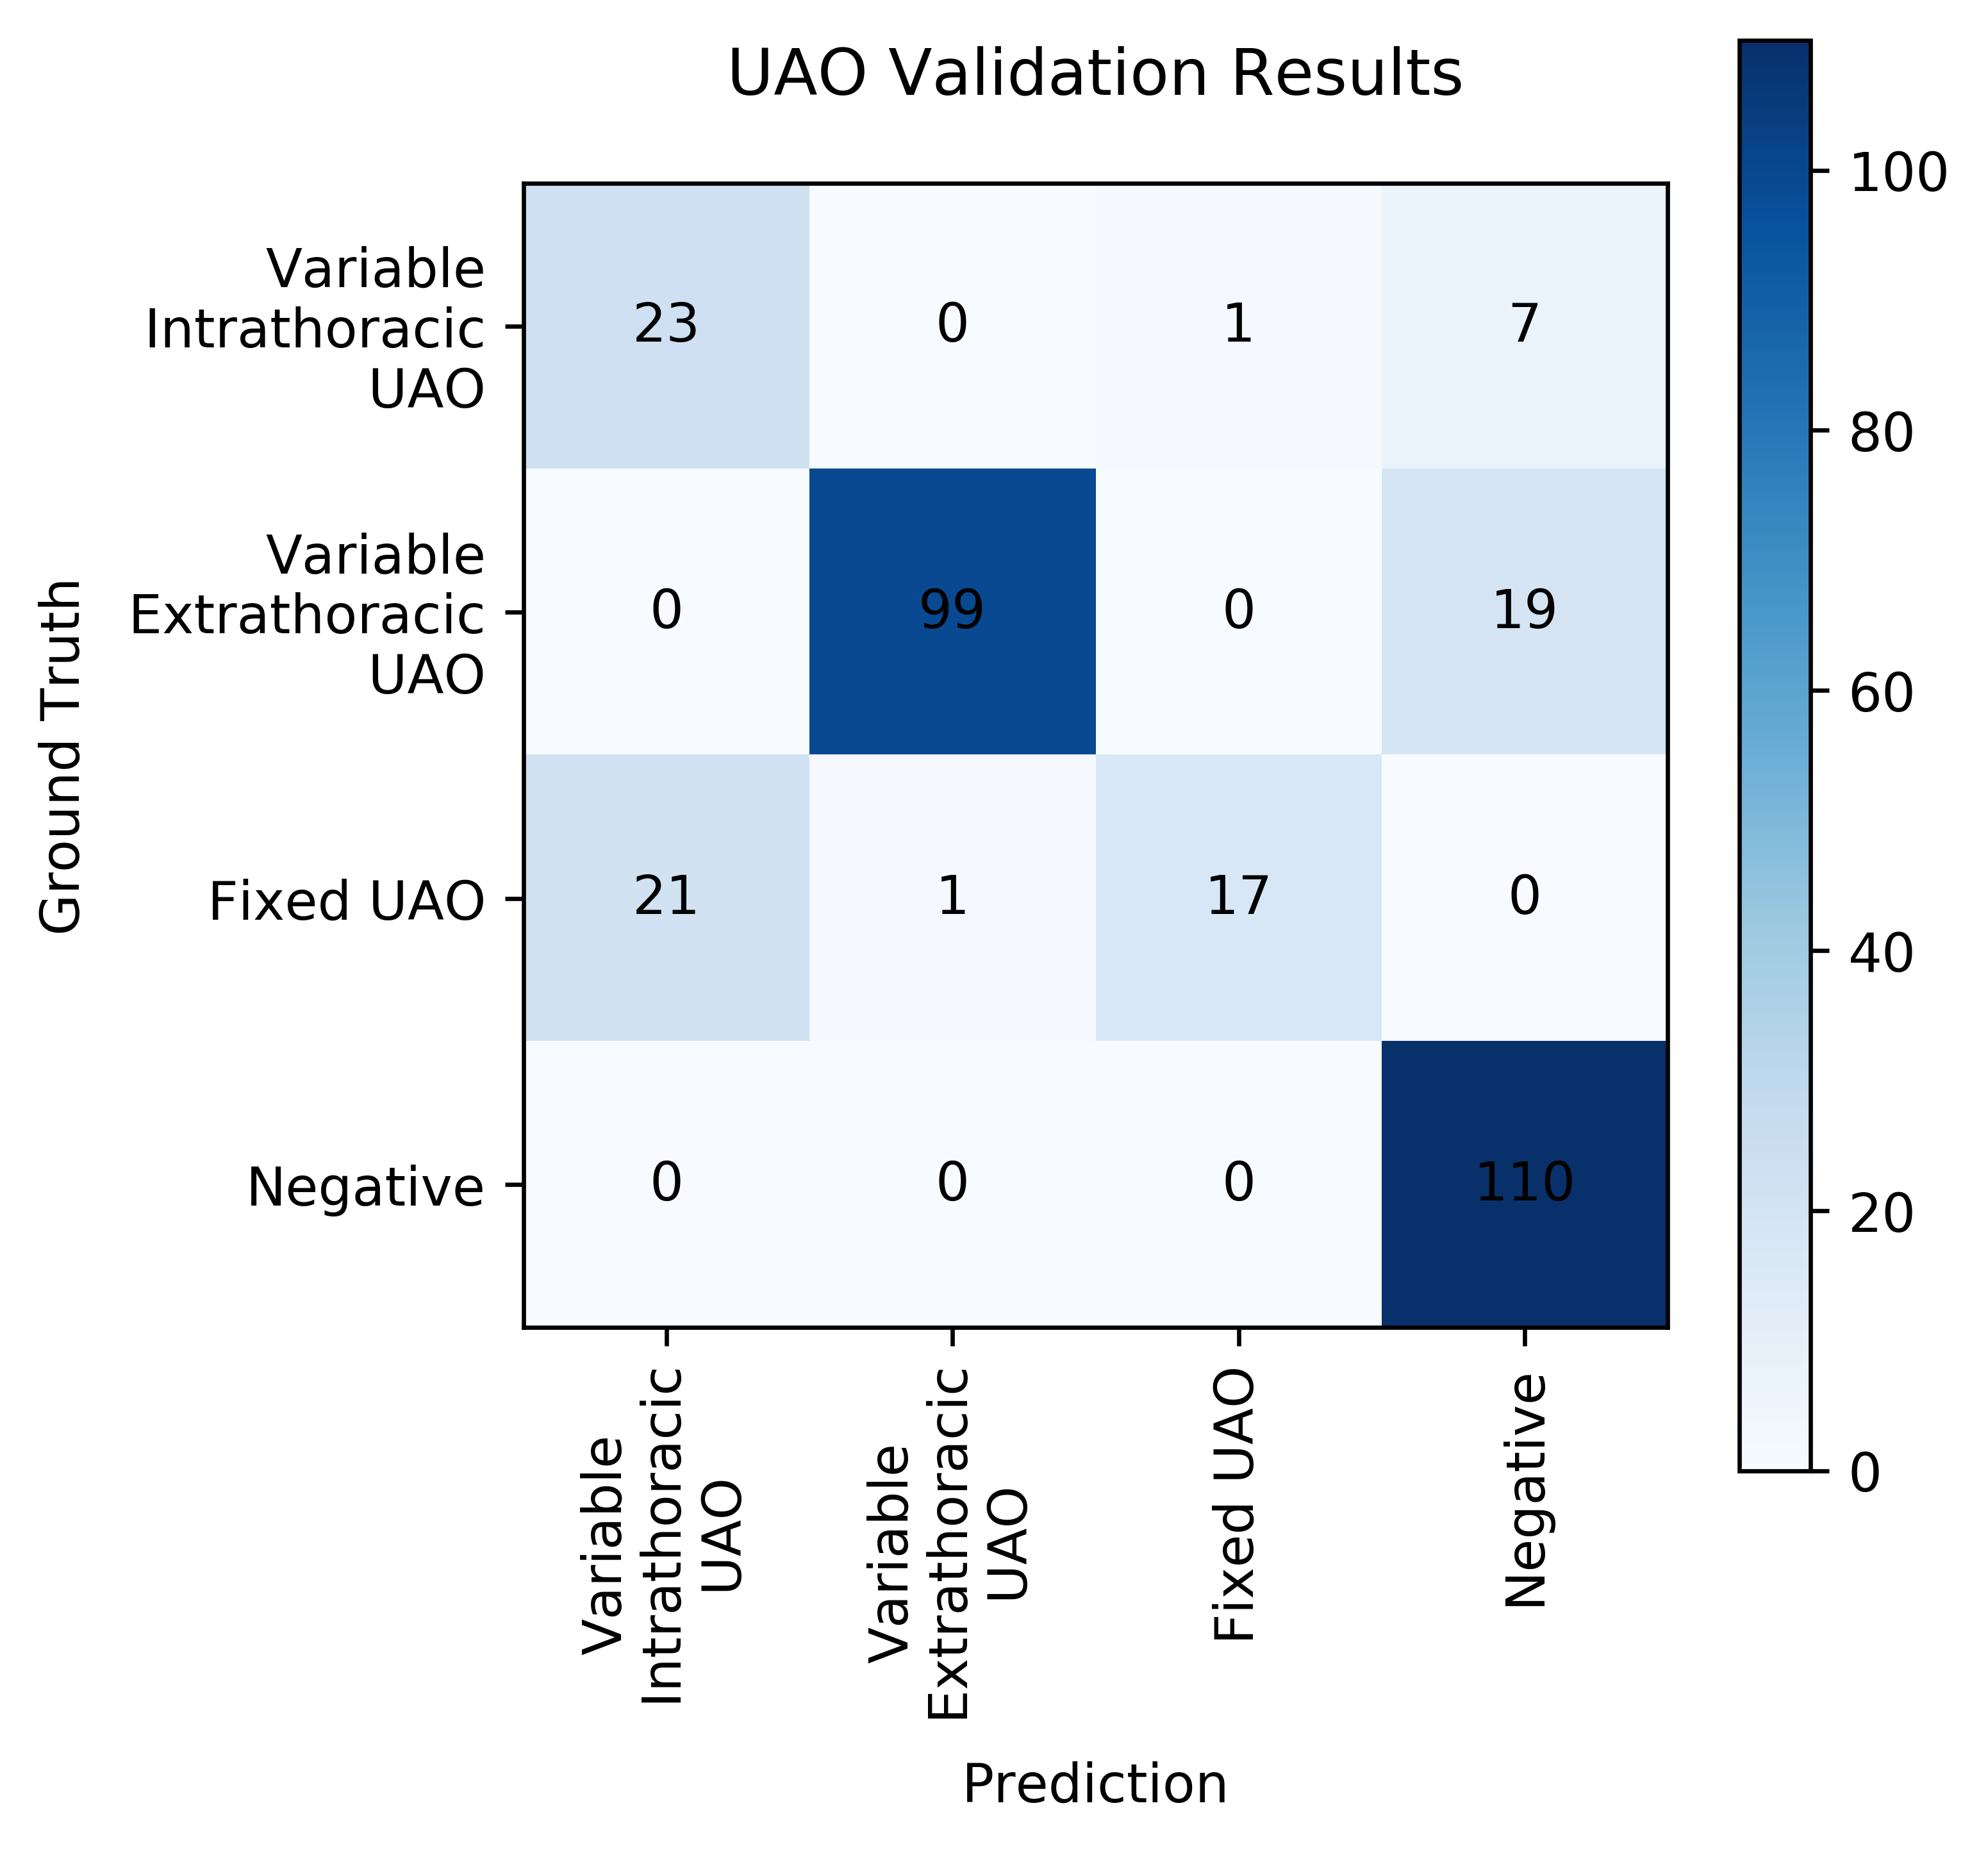


**Legend:** Each column represents the predicted category, the total number of each column represents the number of data predicted to be that category; each row represents the true attribution category of the data, the total number of data in each row represents the number of data instances of that category.

**e-Table 1.** Details of patients before and after therapy

| Parameter | Fixed  (n = 15) | | Variable extrathoracic  (n = 16) | | Variable extrathoracic  (n = 27) | | |
| --- | --- | --- | --- | --- | --- | --- | --- |
|  | Before | After | Before | After | | Before | After |
| Age, y | 53 (34, 62) | 52 (34, 63) | 55 (36, 63) | 55 (36, 63) | | 56 (47, 64) | 57 (47, 64) |
| Sex (M: F), n | 9: 6 |  | 7: 9 |  | | 15: 12 |  |
| BMI, kg/m2 | 21.5  (16.7, 22.1) | 20.0  (18.0, 22.2) | 21.3  (19.6, 24.2) | 22.2  (19.8, 24.8) | | 23.5  (21.1, 25.9) | 24.1  (21.3, 26.5) |
| FVC %pred, % | 85.7  (68.7, 91.5) | 84.4  (65.0, 100.8) | 82.6  (61.9, 102.9) | 92.6  (76.0, 105.1) | | 95.4  (77.4, 105.0) | 99.7  (77.8, 109.1) |
| FEV1 %pred, % | 53.6  (42.5, 70.9) | 65.6  (49.1, 91.0) | 47.4  (28.3, 95.0) | 82.8  (50.6, 98.7) | | 95.8  (72.2, 106.4) | 100.4  (72.2, 107.1) |
| FEV1/FVC ratio | 0.6  (0.5, 0.7) | 0.7  (0.5, 0.8) | 0.4  (0.3, 0.8) | 0.8  (0.5, 0.8) | | 0.8  (0.8, 0.9) | 0.8  (0.8, 0.9) |
| FEF50% %pred, % | 30.3  (24.1, 46.9) | 44.6  (26.4, 68.2) | 18.4  (10.7, 66.6) | 60.3  (25.1, 69.1) | | 84.5  (52.6, 109.0) | 92.0  (65.9, 103.0) |
| FEF75% %pred, % | 44.3  (21.3, 46.9) | 45.7  (30.7, 59.4) | 28.9  (17.0, 66.5) | 55.8  (23.6, 69.1) | | 72.5  (39.8, 87.3) | 63.2  (51.4, 79.0) |
| MMEF %pred, % | 28.8  (21.7, 62.1) | 42.3  (25.7, 64.9) | 23.0  (11.7, 59.0) | 53.7  (25.3, 74.9) | | 76.1  (54.5, 101.5) | 80.5  (63.2, 93.0) |
| FEF50%/FIF50% | 0.9  (0.6, 1.3) | 0.8  (0.7, 1.2) | 0.3  (0.2, 1.2) | 0.7  (0.4, 0.9) | | 1.8  (1.3, 2.7) | 1.2  (1.1, 1.3) |
| FEV1/FEV0.5 | 1.3  (0.9, 1.8) | 1.4  (1.0, 1.5) | 1.2  (0.9, 1.6) | 1.3  (1.1, 1.6) | | 1.2  (0.5, 1.3) | 1.2  (1.1, 1.3) |
| FEV1/PEF, mL/L/min | 13.0  (12.1, 15.4) | 9.7  (6.7, 11.5) | 6.4  (5.6, 7.6) | 8.7  (6.8, 9.6) | | 6.2  (5.6,7.3) | 6.2  (5.4, 6.7) |
| FIF50%, L/min | 94.7  (59.7, 103.9) | 144.4  (76.2, 180.0) | 164.2  (127.6, 204.4) | 235.7  (167.1, 289.7) | | 76.9  (54.5, 124.1) | 136.4  (87.0, 169.3) |
| PEF/PIF ratio | 1.3  (1.1, 1.8) | 1.3  (1.1, 1.7) | 0.9  (0.6, 1.1) | 1.0  (0.9, 1.3) | | 3.4  (2.7, 4.3) | 2.3  (1.8, 3.1) |
| Aexp/Ainp ratio | 1.1  (0.9, 1.2) | 1.3  (0.8, 1.3) | 0.4  (0.2, 0.8) | 0.7  (0.5, 1.0) | | 2.4  (1.5, 3.7) | 1.6  (1.3, 2.5) |

Data are presented as absolute numbers in case of frequencies, median values and quartiles in case of continuous parameters. Abbreviations: UAO = upper airway obstruction; BMI = body mass index; FVC = forced vital capacity; FEVx = forced expiratory volume in x s; FEFx% = instantaneous forced expiratory flow when x% of the FVC has been expired; FIF50% = forced inspiratory flow at 50% of FIVC; MMEF = maximal mid-expiratory flow; PEF = peak expiratory flow; PFT = pulmonary function test; PIF = peak inspiratory flow; EDI = expiratory disproportion; Aexp/Ainp = the ratio of area under the expiratory and inspiratory curves; %pred = %predicted.

**e-Table 2.** Details of clinicians

| **Information** | **Clinicians**  **(N = 432)** |
| --- | --- |
| **Grades of hospitals, n (%)** |  |
| Tertiary | 113 (26.2%) |
| Secondary | 90 (20.8%) |
| Community | 229 (53.0%) |
| **Types of work, n (%)** |  |
| Doctor | 228 (52.8%) |
| Nurse | 133 (30.8%) |
| Technician | 71 (16.4%) |
| **Years of work experience, n (%)** |  |
| Less than 1 year | 258 (59.7%) |
| 1-3 years | 73 (16.9%) |
| More than 3 years | 101 (23.4%) |
| **Time used to perform all tests, min** | 32.4 (21.9, 54.1) |

Data are presented as absolute numbers in case of frequencies, median values and quartiles in case of continuous parameters.
